# Supplementary material for: Thermoelectric properties of flexible PEDOT:PSS-based films tuned by SnSe via the vacuum filtration method
Source: Royal Society of Chemistry journal article supplement (doi:10.1039/d0ra08458a), 2020-01-01
Supplement: d0ra08458a1.pdf [file d0ra08458a1.pdf]

## Supplementary Information

### **Thermoelectric properties of flexible PEDOT:PSS-based films tuned by SnSe via vacuum filtration method**

Zhuqing Yan,<sup>a</sup> Yaxin Zhao,<sup>a</sup> Dan Liu,<sup>\*a</sup> Zhidong Zhang,<sup>a</sup> Yongqiu Zheng,<sup>a</sup> Juan Cui,<sup>a</sup> Yanjun Zhang,<sup>\*a</sup> and  
Chenyang Xue<sup>a</sup>

*Key Laboratory of Instrumentation Science & Dynamic Measurement, Ministry of Education, North University of China, Taiyuan 030051,  
China. E-mail: liudan235@nuc.edu.cn (D. Liu); zhangyanjun@nuc.edu.cn (YJ. Zhang).*

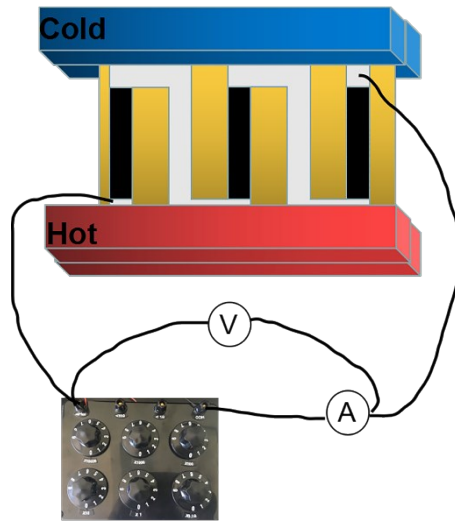

**Fig.S1** Schematic diagram of TE generator output property measurement.

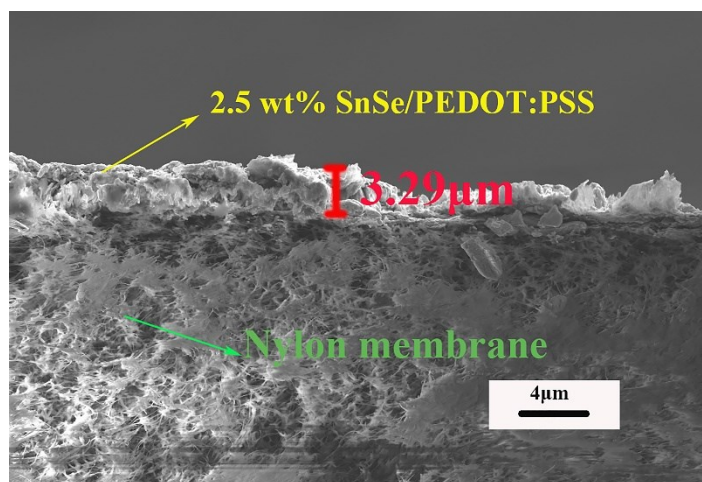

**Fig.S2** Cross-sectional SEM image of 2.5 wt% SnSe/PEDOT: PSS films.

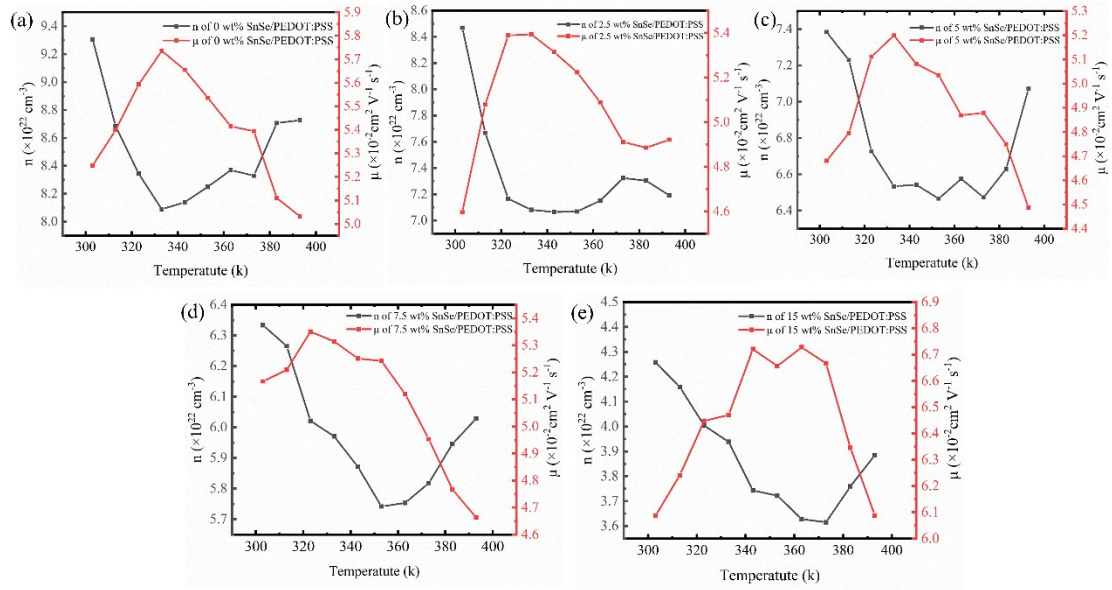

**Fig. S3** Temperature dependence of the  $n$  and  $\mu$  for (a) 0 wt% SnSe/PEDOT:PSS, (b) 2.5 wt% SnSe/PEDOT:PSS, (c) 5 wt% SnSe/PEDOT:PSS, (d) 7.5 wt% SnSe/PEDOT:PSS, (e) 15 wt% SnSe/PEDOT:PSS.

**Table S1.** The thicknesses of the composite films of different SnSe content by SEM images

| SnSe content                    | 0 wt% | 2.5 wt% | 5 wt% | 7.5 wt% | 10 wt% | 15 wt% |
|---------------------------------|-------|---------|-------|---------|--------|--------|
| Film thickness( $\mu\text{m}$ ) | 2.57  | 3.29    | 3.62  | 4.64    | 5.45   | 5.80   |
